# 1 **Developmental innovations promote species diversification in** 2 **mushroom-forming fungi**

3  
4 Torda Varga<sup>1</sup>, Csenge Földi<sup>1</sup>, Viktória Bense<sup>1</sup>, László G. Nagy<sup>1,2\*</sup>

5  
6 1 Synthetic and Systems Biology Unit, Institute of Biochemistry, Biological Research Center,  
7 Eötvös Loránd Research Network (ELKH), Temesvári krt. 62, Szeged H-6726, Hungary

8 2 Department of Plant Anatomy, Institute of Biology, Eötvös Loránd University, 1117  
9 Budapest, Hungary

10 \* To whom correspondence should be addressed: [lnagy@fungenomelab.com](mailto:lnagy@fungenomelab.com)

## 11 12 **Abstract**

13  
14 Fungi evolved complex fruiting body ('mushroom') morphologies as adaptations to efficient  
15 spore dispersal in terrestrial habitats. Mushroom-forming fungi (Agaricomycetes) display a  
16 graded series of developmental innovations related to fruiting body morphology, however,  
17 how these evolved is largely unknown, leaving the functional biology and evolutionary  
18 principles of complex multicellularity in the third largest multicellular kingdom poorly known.  
19 Here, we show that developmental innovations of mushroom-forming fungi that enclose the  
20 spore-producing surface (hymenophore) in a protected environment display significant  
21 asymmetry in their evolution and are associated with increased diversification rates.  
22 'Enclosed' development and related tissues (partial and universal veils) evolved  
23 convergently and became a widespread developmental type in clades in which it emerged.  
24 This probably mirrors increased fitness for protected fruiting body initials in terrestrial  
25 habitats, by better coping with environmental factors such as desiccation or predators,  
26 among others. We observed similar patterns in the evolution of complex hymenophore  
27 architectures, such as gills, pores or teeth, which optimize biomass-to-propagule number  
28 ratios and were found to spur diversification in mushrooms. Taken together, our results  
29 highlight new morphological traits associated with the adaptive radiation of mushroom-  
30 forming fungi and present formal phylogenetic testing of hypotheses on the reproductive  
31 ecology of a poorly known but hyperdiverse clade.

32  
33 Key words: sporocarp, Basidiomycota, macro-evolution, phylogenetic comparative method,  
34 BiSSE, key innovation

## 35 36 **Introduction**

37  
38 Increasing reproductive efficiency is of prime importance to all organisms and has  
39 prompted the evolution of sophisticated mechanisms for protecting offspring. Diverse  
40 solutions evolved for protecting developing youth across the tree of life; all these share  
41 nursing and protective mechanisms that optimize the nutritional investment of the individual  
42 per propagulum. Examples include placentation (Roberts et al., 2016), viviparity and  
43 matrotrophy (Blackburn, 1999) in animals or the seed in embryophytes (Goldberg et al.,  
44 1994). Many such traits are considered key innovations that have spurred lineage  
45 diversification (e.g., viviparity in fishes, Helmstetter et al., 2016), have arisen convergently  
(e.g., viviparity occurred ~150 times in vertebrates, Blackburn, 2015) or underline the

46 evolutionary success of diverse clades (e.g., seed plants, Westoby & Rice, 1982, but see  
47 Vamosi et al., 2018).

48 Fungi reproduce by sexual or asexual spores, which are born on specialized spore-  
49 producing cells. In mushroom-forming fungi (Agaricomycetes), these cells compact into a  
50 spore producing surface, the hymenophore, in which meiosis, spore production and  
51 dispersal takes place. The hymenophore is exposed to environmental impacts (e.g.,  
52 desiccation, precipitation, UV radiation), fungivorous animals, and parasites and many  
53 strategies evolved to protect the hymenophore from these (e.g., Braga et al., 2015). One  
54 such solution is the development of complex fruiting bodies, which provide support, physical  
55 barrier and chemical defense against external factors (Künzler, 2018) as well as facilitates  
56 spore dispersal (Dressaire et al., 2016). Physical protection comes in many forms, including  
57 hyphal sheaths that cover either the entire fruiting body initial (universal veil) or parts of it  
58 (partial veil), or producing spores inside the fruiting body (in gasteroid and secotioid fungi).  
59 All these strategies enclose the hymenophore into a protected environment, at least during  
60 early developmental stages, and we hereafter refer to it as enclosed development.

61 Several key principles of the evolution of fruiting bodies have been uncovered  
62 recently. Phylogenetic comparative analyses confidently suggest that ancestral  
63 morphologies were crust-like and that these repeatedly gave rise to a series of more  
64 complex forms. The most derived ones are called pileate-stipitate morphologies (mushrooms  
65 with cap and stalk), which evolved several times convergently and probably represent stable  
66 attractors in the morphospace (Hibbett, 2004, Varga et al. 2019). Further, the emergence of  
67 complex morphologies correlate with higher diversification rates and may be a major driver  
68 of lineage diversification in mushroom-forming fungi (Agaricomycetes) (Sánchez-García et  
69 al., 2020; Varga et al., 2019). However, beyond the broadest morphological types, we know  
70 little about what drives the evolution of fruiting body morphologies and how novel fruiting  
71 body traits impact speciation and extinction patterns. For example, it is not known what  
72 aspect of the pileate-stipitate morphology – protection of the hymenophore, increased  
73 efficiency of spore dispersal or yet other attributes – may have been the key innovation for  
74 mushroom-forming fungi. Further, there are several phylogenetically co-distributed  
75 morphological innovations, such as structured hymenophore surfaces, which could additively  
76 or in other ways influence diversification rates.

77 Here, we investigate the evolution of enclosed development among mushroom-  
78 forming fungi using comparative phylogenetic analyses and a previously published  
79 phylogeny of 5,284 species (Varga et al., 2019). We demonstrate that enclosed  
80 development evolved repeatedly in the Agaricomycetes and correlates to increased  
81 diversification rate of species. We further show that other, phylogenetically co-distributed  
82 traits (complex hymenophores, the presence of a cap) also impact diversification rates, but  
83 their effects are independent from those of enclosed development. Our results reveal novel  
84 factors in the adaptation of mushroom-forming fungi to terrestrial habitats.

85

## 86 **Material and Methods**

### 87 **Phylogenetic data**

88 All macro-evolutionary analyses were performed on 245 Maximum likelihood  
89 phylograms and ten chronograms inferred in our previous work (Varga et al., 2019). These  
90 trees were inferred from three loci (28S subunit ribosomal RNA, ef1-alpha and RPB2) and a  
91 phylogenomic backbone tree of 104 species, and represents a robust evolutionary

92 framework with ca. one-fifth of all described species in Agaricomycetes sampled. Species  
93 from the classes Dacrymycetes and Tremellomycetes were used as an outgroup. Time  
94 calibration of trees was performed in a two-step Bayesian analysis on ten randomly sampled  
95 phylogenies.

## 96 **Character coding**

### 97 Developmental types

98 The character state assignment was based on whether the developing hymenophore  
99 is open to the environment or insulated from it at some point during development (figure 1,  
100 table S1). In our default coding regime (referred to as 3ST), we divided the diversity of  
101 developmental types into three character states, open (state 0), semi-enclosed (state 1) and  
102 enclosed development (state 2). Open development was defined as the hymenophore being  
103 exposed to the environment from the earliest primordial stages and corresponds to  
104 gymnocarpy *sensu* Reijnders (1948) or exocarpy without any metablemas *sensu* Clémenton  
105 (2012). In semi-enclosed development, the hymenophore is covered by a veil (usually faint)  
106 only in the earliest primordial stages or the cap margin is attached to the stem but detaches  
107 before the start of the cap expansion (hypovelangiocarpy and pilangiocarpy *sensu* Reijnders  
108 (1948)). In enclosed development, the hymenophore is closed at least until the young fruiting  
109 body stage (angiocarpy *sensu* Reijnders (1948) or endocarpy and nodulocarpy *sensu*  
110 Clémenton (2012)). We coded gasteroid/secotioid species as enclosed. For historical  
111 reasons, this morphology is often treated as a separate state, however, from the perspective  
112 of this character, they represent a special case of enclosed development.

113 To accurately define character states and thoroughly investigate the development of  
114 protecting tissue layers, we examined all 52 previous histological studies we could identify  
115 (table S1). From these studies, we made phylogenetically informed extrapolations to whole  
116 genera except for species with unique morphologies. In addition to plectological information,  
117 we gathered data on veil structures from the literature. In rare cases, we visually inspected  
118 images of young fruiting bodies and veil or tissue remnants on the cap and stipe. If assigning  
119 a state to species with confidence was not possible, we coded it as an ambiguous state. It is  
120 important to note that this character coding strategy lumps together multiple, traditionally  
121 recognized morphologies along the main criterion of exposure of hymenium (e.g., resupinate  
122 and coralloid forms in open development, or certain boletoid and agaricoid species in  
123 enclosed development).

124 To explore the robustness of the results to character state coding, we developed four  
125 alternative character state coding regimes (table S1). This was necessary as the extent of  
126 the hymenophore enclosure shows a continuum between fully open and enclosed. We broke  
127 up this continuum into discrete states to our best judgements and thoroughly examined if  
128 any bias could be introduced by the discretization of the character (see below). A character  
129 coding regime was created where a fourth character state was assigned to species with  
130 sequestrate or gasteroid fruiting bodies (referred to as 4ST1). We created further two  
131 modified versions of this four-state character coding. First, character states for certain  
132 ambiguous taxa were changed (4ST2): *Cribbea* spp. from state 0/3 to state 0, *Crinipellis*  
133 spp., *Lactarius* spp., *Marasmiellus* spp., *Tetrapyrgos* spp. from state 0/1 to state 0, *Deconica*  
134 spp., *Lactarius* spp. from state 0/2 to state 2, *Galerina* spp. from state 1/2 to state 2,  
135 *Pleuroflammula* spp. from state 1 to state 2, *Phaeocollybia* spp. from state 1/2 to state 0,  
136 some *Marasmius* spp. and *Mycena* spp. from state 1 to state 0 and *Naucoria* spp. from state  
137 0/1 to state 2. Second, we re-coded all marasmoid fungi to state 0 (four states dataset 3,

138 4ST3) because certain histological studies (e.g., Cl  mencon, 2012; Reijnders, 1983)  
139 described only a faint and loose tissue layer between the cap and stipe at very early  
140 developmental stages. In the fourth alternative coding regime, to distinguish cyphelloid fungi  
141 from state 0, we produced a five-character state coding (5ST).

142 Finally, to examine the effects of multiple binary traits in one model, we created a  
143 binary coding by merging the semi-enclosed with the enclosed state of the 3ST coding  
144 regime into one state (2ST1). This appeared feasible because these two states behaved  
145 similarly in the trait dependent diversification analyses. In addition to this, we created a  
146 binary coding where semi-enclosed and open development were merged (2ST2) and where  
147 we randomly distributed the semi-enclosed state between species with enclosed or open  
148 development states (2ST3).

#### 149 Partial and universal veil and hymenophore

150 We coded veil character states for each of the species in the phylogeny as two binary  
151 traits as follows (table S1). The partial veil (Cl  mencon, 2012) is defined as hyphal tissues  
152 that grow between the cap margin and the stipe and covers only the developing cap  
153 (including the hymenophore). The universal veil, on the other hand, covers the entire young  
154 fruiting body. In cases where a veil's presence was not clear, we coded the species as  
155 ambiguous. In a few cases the nature of a veil was hard to define, therefore we created a  
156 veil coding where species with any of the veils were coded as state 1 and species without  
157 veils to state 0.

158 We included two additional morphological traits that could influence diversification  
159 rates: cap formation and increased hymenophore surface area. We obtained character  
160 coding for the cap from (Varga et al. 2019). For the hymenophore, we distinguished three  
161 character states based on the structural complexity of the hymenophore surface (table S1).  
162 Character state 0 was assigned to species with a smooth hymenophore. Character state 1  
163 was assigned to species with weakly-structured hymenophore, which barely increases the  
164 hymenophore's surface (e.g., veins, ridges, bumps). Character state 2 was assigned to  
165 species with complex hymenophores (e.g., gills, pores, teeth) (figure 2). To include the  
166 hymenophore into a multitrait binary model, we merged the smooth and weakly-structured  
167 states into state 0, and we assigned state 1 to species with complex hymenophore.



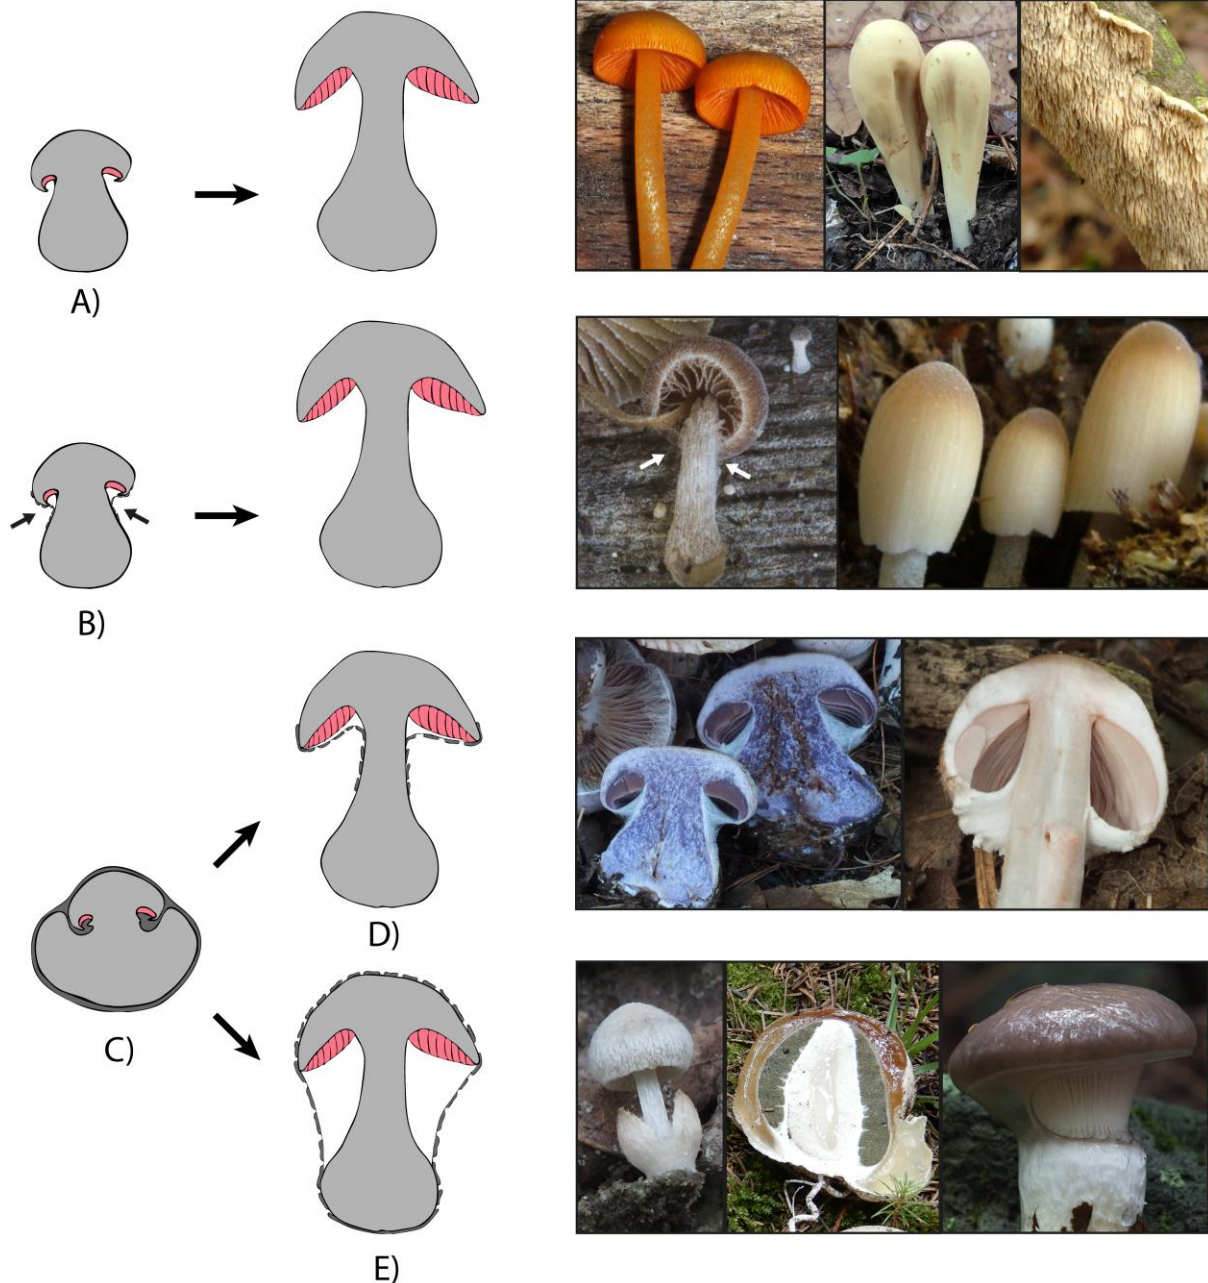

168

169 *Figure 1. Developmental types in mushroom-forming fungi. Drawings depict primordial (left)*  
 170 *and young fruiting bodies (right) of different developmental types. Magenta color shows the*  
 171 *hymenial tissues. Dark grey color indicates tissues having role in the enclosure of the*  
 172 *developing fruiting body* A) *Open development state. Images (left to right):* *Mycena leiana,*  
 173 *Clavariadelphus pistillaris* *and* *Irpex lacteus* B) *Semi-enclosed development state. Note the*  
 174 *faint tissue layer covering the hymenium of the primordium (arrowheads). Images (left to*  
 175 *right):* *Ramicola sp.* *and* *Coprinellus congregatus.* C) *Enclosed development state; a robust*  
 176 *tissue covers either the whole primordium or the hymenophore. D) and E) are subtypes of*  
 177 *the enclosed development state showing partial and universal veils, respectively. D) Young*  
 178 *fruiting body with partial veil Images (left to right):* *Cortinarius sp., Agaricus silvaticus.* E)  
 179 *Young fruiting body with universal veil. Images (left to right):* *Volvariella sp., Phallus*  
 180 *impudicus. Gomphidius glutinosus. Image courtesy: Alexey Sergeev, Judit Tóth Kőszeginé,*  
 181 *László G. Nagy, Torda Varga.*

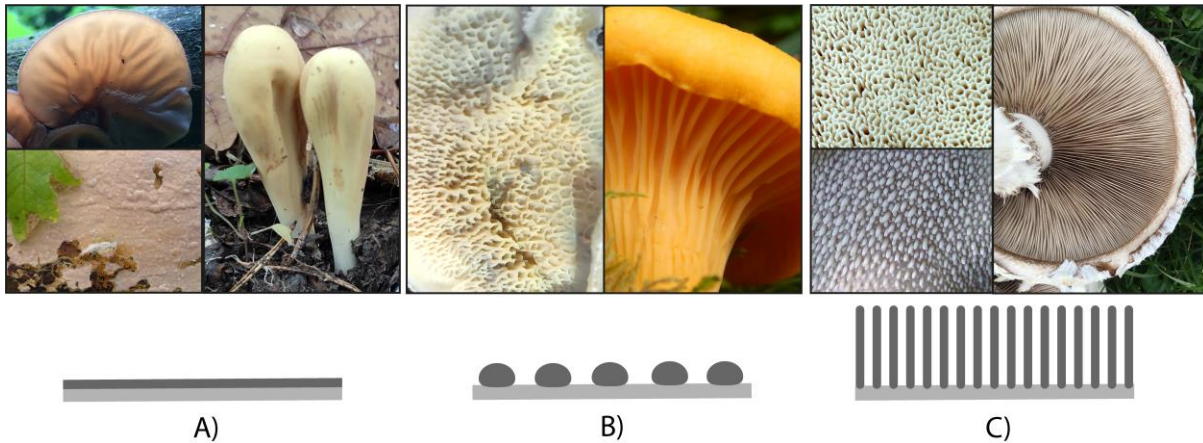

182

A)

B)

C)

183 *Figure 2. Three states/grades of hymenophore complexity distinguished in this study. A)*  
184 *Smooth hymenophore. Images: Auricularia auricula-judae (top), Clavariadelphus pistillaris*  
185 *(right) and Cyindrobasidium sp. (bottom). B) Weakly-structured hymenophore. Images:*  
186 *Phlebia tremellosa and Cantharellus cibarius. C) Complex hymenophore. Images:*  
187 *Bondarzewia montana (top), Nemecomyces mongolicus (right) Hydnum repandum (bottom).*  
188 *In schematic figures grey and dark grey denote supporting tissue (e.g., trama, subiculum)*  
189 *and sporogenous tissue (hymenium), respectively. Image courtesy: Judit Tóth Kőszeginé,*  
190 *Valéria Borsi, László G. Nagy, Torda Varga.*

191

## 192 Ancestral state reconstruction

193 Maximum parsimony (MP) based ancestral character state reconstruction (ASR) was  
194 performed using hsp\_max\_parsimony function from the castor v.1.5.5. R package (Louca &  
195 Doebeli, 2018) to calculate the number of origins of the different character states. We used a  
196 weighted transition cost matrix created from the transition rates inferred in the BayesTraits  
197 analysis (see below). First, we calculated the mean of the transition rates inferred through  
198 Bayesian and ML analysis in BayesTraits. Then we took the reciprocal of the values and  
199 shifted all values by the maximum of the reciprocal matrix to create a more significant gap  
200 between no cost (diagonal of the cost matrix) and the lowest cost transition. The  
201 hsp\_max\_parsimony function handles ambiguous character states as unknown states. To  
202 calculate the number of origins in ten chronograms of 5,284 species, we used a custom R  
203 function available at [github.com/vtorda/ASR\\_analysis](https://github.com/vtorda/ASR_analysis).

## 204 Character state evolution

205 To infer macro-evolutionary transition rates, we used Maximum Likelihood (ML) and  
206 Markov Chain Monte Carlo (MCMC) approaches implemented in BayesTraits 2.0 Linux 64  
207 Quad Precision alternative build (Meade & Pagel, 2016) and in diversitree 0.9-10 R  
208 (Fitzjohn, 2012). BayesTraits analyses were performed on 245 phylogenetic trees using the  
209 Multistate module of the program. We chose a gamma hyper-prior distribution for transition  
210 rates (table S2), which empirically fit best the data. This was determined based on  
211 preliminary analyses with uniform, exponential and gamma priors with and without a hyper-  
212 prior.

213 We observed high transition rate from semi-enclosed to open development which we  
214 hypothesised was caused by spuriously inferring an early gain of semi-enclosed, followed by  
215 frequent reversals to open development. To address this, we performed two additional tests.  
216 First, we examined whether constraining the stem nodes of 13 class- or order-level clades

217 (Dacrymycetes, Cantharellales, Sebaciniales, Auriculariales, Phallomycetidae,  
218 Trechisporales, Hymenochaetales, Boletales, Russulales+Polyporales, the hygrophoroid  
219 clade *sensu* Matheny (Matheny et al., 2006), Atheliaceae+Pterulaceae+Pleurotaceae,  
220 Physalacriaceae, agaricoid clade *sensu* Matheny et al. 2006) to open development state  
221 affects the transition rates. Second, we examined the contribution of individual clades to  
222 transition rates by setting state 1 or 01 of all species in a clade at a time to 0 and state 12 to  
223 2. The rationale of this test was that a dramatic change in the transition rates relative to the  
224 original values, could mark a given clade as the main contributor to the global pattern. The  
225 following clades *sensu* Matheny et al. 2006 were examined with this procedure: Marasmioid  
226 clade, Tricholomatoid clade, Agaricoid clade, Psathyrellaceae, Boletales and Russulales  
227 (table S1).

228 All preliminary BayesTraits analyses (prior selection, constraining deep nodes, clade  
229 specific character state coding) were conducted with the following settings: 1,010,000  
230 generations, 10,000 burn-in and sampling every 500<sup>th</sup> generation. We observed that MCMC  
231 generally visited only ~15 out of the 245 trees, which means 230 trees did not contribute  
232 toward our results (probably because Markov chains sampled trees in proportion to their  
233 likelihood). To overcome this, we forced the chain to spend 200,000 generations on each  
234 tree by the *EqualTrees* command and applying 100,000 burn-in and sampling every 500<sup>th</sup>  
235 generation (altogether 49 million generations).

236 We used a less computationally demanding strategy for alternative character state  
237 coding regimes. In the case of 4ST1, 4ST2, and 4ST3 coding regimes, Markov chains were  
238 run for 10 million, while in the case of 5ST for 20 million generations with 10% burn-in and  
239 sampling every 500<sup>th</sup> generation.

240 Marginal likelihoods were estimated by the stepping stone method (Meade & Pagel,  
241 2016; Xie et al., 2011) using 50 stones with chain lengths of 5,000. Every analysis in  
242 BayesTraits was repeated three times to check the congruence of independent runs.

243 We performed model tests by comparing the unconstrained model and a nested  
244 model where certain constraints were made on the parameters. First, we tested if there is a  
245 tendency towards the evolution of any character states by constraining forward and reverse  
246 transition rates to be equal. This means one or three pair-wise constraints ( $q_{01} = q_{10}$ ,  $q_{12} =$   
247  $q_{21}$ ,  $q_{02} = q_{20}$ ) in case of binary or three state coding, respectively, and a constraint where all  
248 rates are equal ( $q_{01} = q_{10} = q_{12} = q_{21} = q_{02} = q_{20}$ ). To explore if a particular transition rate is  
249 supported by the data, we set the rate to zero ( $q_{10}=0$  or  $q_{01}=0$  or  $q_{21}=0$  or  $q_{12}=0$  or  $q_{20}=0$  or  
250  $q_{02}=0$ ). Each of the constrained models mentioned above were compared to the best fit  
251 model using log-likelihood ratios (LR, ML analyses) or the log marginal likelihood ratio  
252 (Bayes factor, MCMC analyses). As a rule of thumb LR > 4 or Bayes factors > 10 was  
253 considered as significant support (Pagel, 1999).

254 Using ten chronograms, we also inferred transition rates and performed model testing  
255 under the multistate speciation and extinction (MuSSE, Fitzjohn, 2012) or the binary state  
256 speciation and extinction (BiSSE, Maddison et al., 2007) models for enclosed development  
257 2ST and 3ST, increased hymenophore 3ST and 2ST, universal veil and partial veil traits.  
258 Significant differences among alternative models were determined by the likelihood ratio test  
259 (LRT) and Akaike information criterion scores (Fitzjohn, 2012; Meade & Pagel, 2016; Pagel,  
260 1999), where  $p < 0.05$  was considered to be significant. In case the enclosed development  
261 2ST3 coding regime, we generated 100 perturbed traits by randomly distribute the semi-  
262 enclosed state to the two other states. Using this dataset and ten chronograms we  
263 performed 1,000 ML BiSSE analyses to infer transition, speciation and extinction rates.



## 264 Trait-dependent diversification analyses

265 We used ten chronograms from our previous work (Varga et al., 2019) to analyze trait  
266 dependent diversification using the MuSSE or the BiSSE models implemented in diversitree  
267 v.09-10 R (Fitzjohn, 2012; Maddison et al., 2007). Transition, speciation, and extinction rates  
268 were inferred by using both ML and Bayesian MCMC. Starting points of ML searches were  
269 determined by the functions *starting.point.musse*, *starting.point.bisse*, and the analyses were  
270 corrected by state-specific sampling fractions (table S3) calculated by using our previous  
271 procedure, based on the number of species in Species Fungorum (Varga et al., 2019).  
272 Bayesian MCMC was performed using an exponential prior (defined by  $1/(2r)$ , where  $r$  is the  
273 character independent diversification rate) and Markov chains were run for 20,000  
274 generations with 10% burn-in. The MCMC sampler's step size was optimized after running  
275 100 generations. Convergence of chains was inspected based on the variation of parameter  
276 values as a function of the number of generations.

277 We performed LRT to compare alternative models. We constrained state-specific  
278 speciation or extinction rates to be equal ( $\lambda_0 = \lambda_1$  or  $\lambda_0 = \lambda_2$  or  $\lambda_1 = \lambda_2$  or  $\mu_0 = \mu_1$  or  $\mu_0 = \mu_2$  or  
279  $\mu_1 = \mu_2$ ) and performed LRT on the unconstrained model and the constrained models. We  
280 also tested whether a particular speciation or extinction rate is a significant component of the  
281 model by constraining it to zero ( $\lambda_0 = 0$  or  $\lambda_1 = 0$  or  $\lambda_2 = 0$  or  $\mu_0 = 0$  or  $\mu_1 = 0$  or  $\mu_2 = 0$ ).

282 To analyze the effect of multiple binary traits on speciation and extinction rates in one  
283 model simultaneously, we used multitrait MuSSE model (Fitzjohn, 2012). The  
284 parameterization of the multitrait MuSSE model is analogous to that of a linear regression  
285 model. Consequently, an intercept (a "background rate") and main effects (the effect of state  
286 1 of any traits) are inferred. We analyzed two trait combinations: enclosed development –  
287 increased hymenophore surface area and enclosed development – cap. First, we compared  
288 the model where only the intercept was inferred ("depth" argument =  $c(0,0,0)$ ) with the model  
289 where the main effect of the diversification was included ("depth" argument =  $c(1,1,0)$ ) with  
290 performing LRT. Next, we carried out a Bayesian MCMC analysis using an exponential prior  
291 (defined by  $1/(2r)$ , where  $r$  is the character independent diversification rate), and Markov  
292 chains were run for 20,000 generations with 10% burn-in. We also examined the significance  
293 of the main effects of the binary traits by performing LRT on models where the effect of one  
294 of the traits was constrained to be 0 ( $\lambda_A = 0$  or  $\lambda_B = 0$ ). Finally, we compared the posterior  
295 distribution of parameter estimates of the multitrait MuSSE model and that of BiSSE models  
296 to examine how the speciation and extinction rates changed when analyzed within one  
297 model.

298 To rule out the possibility that the diversification rate pattern of enclosed development  
299 is driven by a trait which is not examined in this paper, we performed analyses by under the  
300 hidden state speciation and extinction (HiSSE) model (Beaulieu & O'Meara, 2016)  
301 implemented in RevBayes (Höhna et al., 2016). We defined a general HiSSE model where  
302 an observed binary and a hidden binary trait were included, and each of the four states can  
303 affect the diversification rate. We generated posterior samples by MCMC. Following the  
304 RevBayes manual (Höhna et al., 2019), we set a log-normal prior distribution for hidden  
305 speciation and extinction rate with a median of 1 and a standard deviation drawn from an  
306 exponential distribution with an empirical mean (0.587405). We specified a log-uniform  
307 distribution on the speciation and extinction rates of the observed trait between  $10^{-6}$  and  $10^2$ .  
308 For observed and hidden transition rates, we defined an exponential prior with the mean of  
309 10 transitions / total tree length. The sampling fraction parameter of the birth-death model  
310 was set to 0.148995, which was calculated based on known species numbers in the Species



311 Fungorum database. We ran three independent chains for 4,500 generations each.  
312 Convergence was assessed by visually inspecting the saturation of likelihood and parameter  
313 values. We also evaluated geweke diagnostic plots (Geweke, 1992) implemented in the  
314 coda v.0.19-3 R (Plummer et al., 2006). We discarded samples prior to convergence and  
315 calculated effective sample sizes (ESS) for all parameters by the effectiveSize function.

316

## 317 **Results**

### 318 **Enclosed development is the favored direction of evolution**

319 We examined whether there is a trend towards enclosed development in the evolution of  
320 mushroom-forming fungi (Agaricomycetes) using comparative phylogenetic methods on  
321 previously published phylogenies of 5,284 species (Varga et al., 2019). MP ancestral state  
322 reconstructions on ten chronograms (table S4, figure S1) suggested that the most  
323 recent common ancestor of the Agaricomycetes likely had open development. Semi-  
324 enclosed and enclosed development evolved 19-23 and 72-83 times, respectively,  
325 depending on the tree analyzed. Reversals to open development may have also happened  
326 15-22 times. If we examined only internal nodes, 4-8, 11-14, and 25-31 transitions were  
327 inferred to open, semi-enclosed and enclosed development (figure 3), indicating that a  
328 significant proportion of transitions happened deeper in the tree. In line with these results,  
329 model inferences under maximum likelihood indicated significant asymmetries in transition  
330 rates among developmental types (figure 3). The highest average transition rates were  
331 inferred for the transition from the semi-enclosed to the enclosed state ( $q_{12}$ ); these rates  
332 were 8.6 - 21.0 times higher than the reverse rates ( $q_{21}$ ). Our results also suggest that the  
333 reversal from semi-enclosed to open development ( $q_{10}$ ) is frequent across the phylogeny.  
334 Model comparisons indicated that these asymmetric rate values were also significantly  
335 different from each other in all cases (LRT,  $p < 0.05$ , log Bayes Factor  $> 10$ ; tables S2 and  
336 S5). Model testing also suggested that all transition rates were crucial parameters of the  
337 evolutionary model (i.e., significantly greater than zero, LRT,  $p < 0.05$ , Bayes factor  $> 10$ ).

338 Overall, these analyses suggest that enclosed development is a frequently-evolving  
339 and stable character state and its evolution is the preferred direction in mushroom-forming  
340 fungi. It may emerge either via a semi-enclosed intermediate (mean rate,  $q_{01} = 0.02$  and  $q_{12}$   
341  $= 1.16$ ) or could directly evolve from open development (mean rate,  $q_{02} = 0.10$ ). Given that  
342 this developmental type provides the strongest physical protection from the environment of  
343 the three character states (but also requires the largest nutritional investment), it is  
344 conceivable that it confers a fitness advantage for mushroom-forming fungi, especially for  
345 those that produce above-ground fruiting bodies. On the other hand, the semi-enclosed state  
346 appears evolutionarily labile; once evolved, it either transforms into more persistent  
347 protective structures (enclosed state) or is lost rapidly (reversal to open), possibly due to the  
348 fugacious, incomplete protection it can provide to fruiting body initials.

349 Ancestral position of open development and convergent evolution of enclosed forms  
350 was also speculated in the Ascomycota. Phylogenetic studies of Pezizomycotina placed  
351 species with open fruiting bodies (apothecia) basally those with closed ones (perithecia) in  
352 more derived positions (Liu & Hall, 2004). In a lichen-forming ascomycetes group  
353 (Lecanoromycetes), several independent occurrences of enclosed (angiocarp) fruiting  
354 bodies were detected (Schmitt et al., 2009).

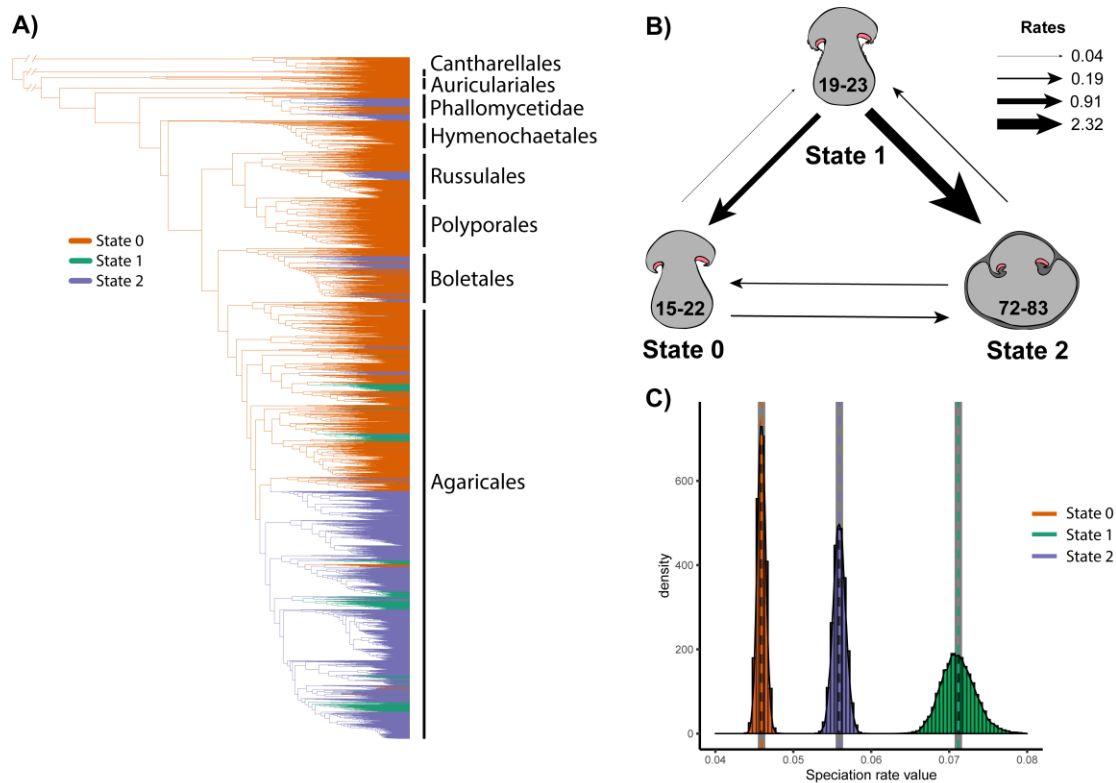

355  
 356 *Figure 3. Macro-evolutionary patterns of enclosed development. A) Maximum parsimony*  
 357 *ancestral state reconstruction of the 3ST coding regime. State 0 – Open development, State*  
 358 *State 1 - Semi-enclosed development, State 2 – Enclosed development. B) Evolutionary*  
 359 *transitions between open (state 0) semi-enclosed (state 1) and enclosed (state 2)*  
 360 *development. Number intervals on each schematic graphics of the states show the number*  
 361 *of times a state evolved as inferred by maximum parsimony based on 10 trees. Arrows*  
 362 *denote transition rates between states, their width is proportional to the mean transition rates*  
 363 *inferred by BayesTraits. C) Histograms show the posterior probability distribution of state-*  
 364 *dependent speciation rates inferred by MuSSE.*  
 365

### 366 **Robustness to alternative character state codings**

367 As character coding is always associated with a degree of subjectivity, we identified  
 368 four potential major sources of subjectivity and addressed whether the above conclusions  
 369 hold under alternative coding regimes. First, we tested if highly derived fruiting body  
 370 morphologies (e.g., gasteroid or cyphelloid species) disproportionately contributed to the  
 371 inferred patterns by recoding them as alternative character states (coding regimes 4ST1,  
 372 4ST2, 4ST3, 5ST). Second, we also tested if an early emergence of semi-enclosed  
 373 development could cause spuriously high backwards transition rate to open development, or  
 374 third, if certain major clades can individually drive the patterns observed above (figures S2-  
 375 S3). Finally, given the difficulty of recognizing the semi-enclosed state, we addressed  
 376 whether lumping it together with either of the other states, or randomly distributing it among  
 377 them impacts our inferences (2ST1, 2ST2, 2ST3). Overall, we found that the transition rate  
 378 pattern observed above (high  $q_{10}$  and  $q_{12}$  and low  $q_{21}$  and  $q_{01}$ ) was consistent across all  
 379 alternative coding regimes (summarized in Supplementary Text S1, tables S2-S3). These  
 380 findings indicate that our results are robust to character coding perturbations in the four most  
 381 likely sources of subjectivity we identified.

## 382 **Enclosed development is associated with elevated species diversification rate**

383 After we ascertained that the inferred transition rate patterns are robust, we evaluated  
384 the impact of enclosed development on speciation and extinction rates using state-  
385 dependent speciation and extinction (SSE) models. Species with semi-enclosed  
386 development have the highest net diversification rate (range of mean values across  
387 analyses:  $6.5 \times 10^{-2} - 8 \times 10^{-2}$  events per million years), followed by species with enclosed  
388 development ( $5.5 \times 10^{-2} - 6.1 \times 10^{-2}$ ) and open development ( $4.6 \times 10^{-2} - 5.2 \times 10^{-2}$ ) (figure  
389 3, Supplementary Table 3.), based on analyses of ten chronograms under the MuSSE model  
390 and ML or Bayesian methods. We found that speciation rate drove the differences in net  
391 diversification rates, because 26 out of 30 model tests showed significant differences in  
392 speciation rates (LRT,  $p < 0.05$ ), but non-significant differences between any pair of  
393 extinction rates (Supplementary Table 5.). These results were robust to merging the semi-  
394 enclosed character state with either of the other two states and to randomly distributing it  
395 among other states (essentially reducing it to a BiSSE), implying that both semi-enclosed  
396 and enclosed development positively affect the diversification rate (Supplementary Text S1).  
397 We hypothesize that the elevated diversification rate stems from improved reproductive  
398 success conferred by the protection of fruiting body development, regardless of the  
399 complexity or the persistence of the given structure.

## 400 **Both partial and universal veils contribute to the diversification rate increase**

401 Protection of fruiting body initials in species with enclosed development is provided  
402 by at least two morphological structures, the partial and universal veil, both of which could  
403 potentially drive increased diversification inferred above. The partial veil covers the  
404 hymenophore by stretching between the stem and the edge of the cap, whereas the  
405 universal veil envelopes the whole fruiting body when young. As the majority of species with  
406 enclosed or semi-enclosed development possess at least one kind of veil (figure 4), we  
407 attempted to dissect their contributions to diversification. The net diversification rate of  
408 species with universal or partial veils, respectively, was 1.23 and 1.33 times higher than that  
409 of species without either veil type (figure S4). As in the case of developmental types,  
410 diversification rate differences appear to be driven by differences in speciation rate, not  
411 extinction rate (LRT,  $p < 0.05$ ). We found similar results when the universal and partial veil  
412 traits were combined into one trait (tables S3 and S5). These data suggest that both  
413 universal and partial veils contribute to increased diversification rates in species with (semi-  
414 )enclosed development. Although the exact ways in which veils increase fitness remain  
415 unknown at the moment, the upregulation of insecticidal and nematocidal toxin producing  
416 genes in veils suggest they may be involved in chemical and physical defense (Boulianne et  
417 al., 2000; Sabotič et al., 2011).

## 418 **The impact of enclosed development on diversification is independent of other** 419 **observed or unobserved traits**

420 Diversification rate differences can be driven by single or by interactions between  
421 multiple traits (Rabosky & Goldberg, 2015). We therefore tested whether the observed  
422 impact of developmental type on diversification rate could have been influenced by  
423 phylogenetically co-distributed characters (figure 4). We first examined the simultaneous  
424 effect of enclosed development and other morphological traits (morphological complexity of  
425 the hymenophore and the presence of a cap) in a multitrait speciation and extinction model  
426 (multitrait MuSSE). This model allowed us to decipher the background and the individual

427 (“main trait”) effects of binary traits on diversification rate, and thus to separately evaluate  
428 the contribution of each trait to diversification rate changes (Fitzjohn, 2012).

429 In the multitrait MuSSE framework the models with main trait effects were superior  
430 over the model with only the "background" effect (LRT,  $p < 0.05$ ). We found that enclosed  
431 development, the hymenophore and the cap were all significant components of the model  
432 with main trait effects, because the log-likelihoods of the unconstrained models were  
433 significantly higher than that of models where the effect of one or the other trait was  
434 constrained to zero (LRT,  $p < 0.05$ ). We found that the speciation rate differences under two  
435 states ( $\lambda_1 - \lambda_0$ , called ‘trait effect’) in the multitrait analyses were lower than those in the BiSSE  
436 analyses (figure 4). This indicates that speciation rate differences inferred under BiSSE are,  
437 to an extent, arise from the interaction of two traits. However, the speciation rates of lineages  
438 with any of the traits remained significantly higher ( $\lambda_1 - \lambda_0 > 0$ , LRT,  $p < 0.05$ , figure 4) than that  
439 of clades without the trait, indicating a robust and independent positive impact on  
440 diversification by each of the three traits (enclosed development, hymenophore, or the  
441 presence of a cap). This suggests that the increased diversification of species with enclosed  
442 development is independent of both the complexity of the hymenophore or the presence of a  
443 cap.

444 To address the possibility that other unobserved or hidden traits drove the observed  
445 patterns, we performed a hidden state speciation and extinction (HiSSE) analysis. We found  
446 that the speciation rate of species with enclosed development was higher than that of non-  
447 enclosed (figure S5), even in the presence of a hidden trait in the HiSSE model, suggesting  
448 that the diversification rate patterns we identified are indeed attributable to innovations in  
449 developmental mode.



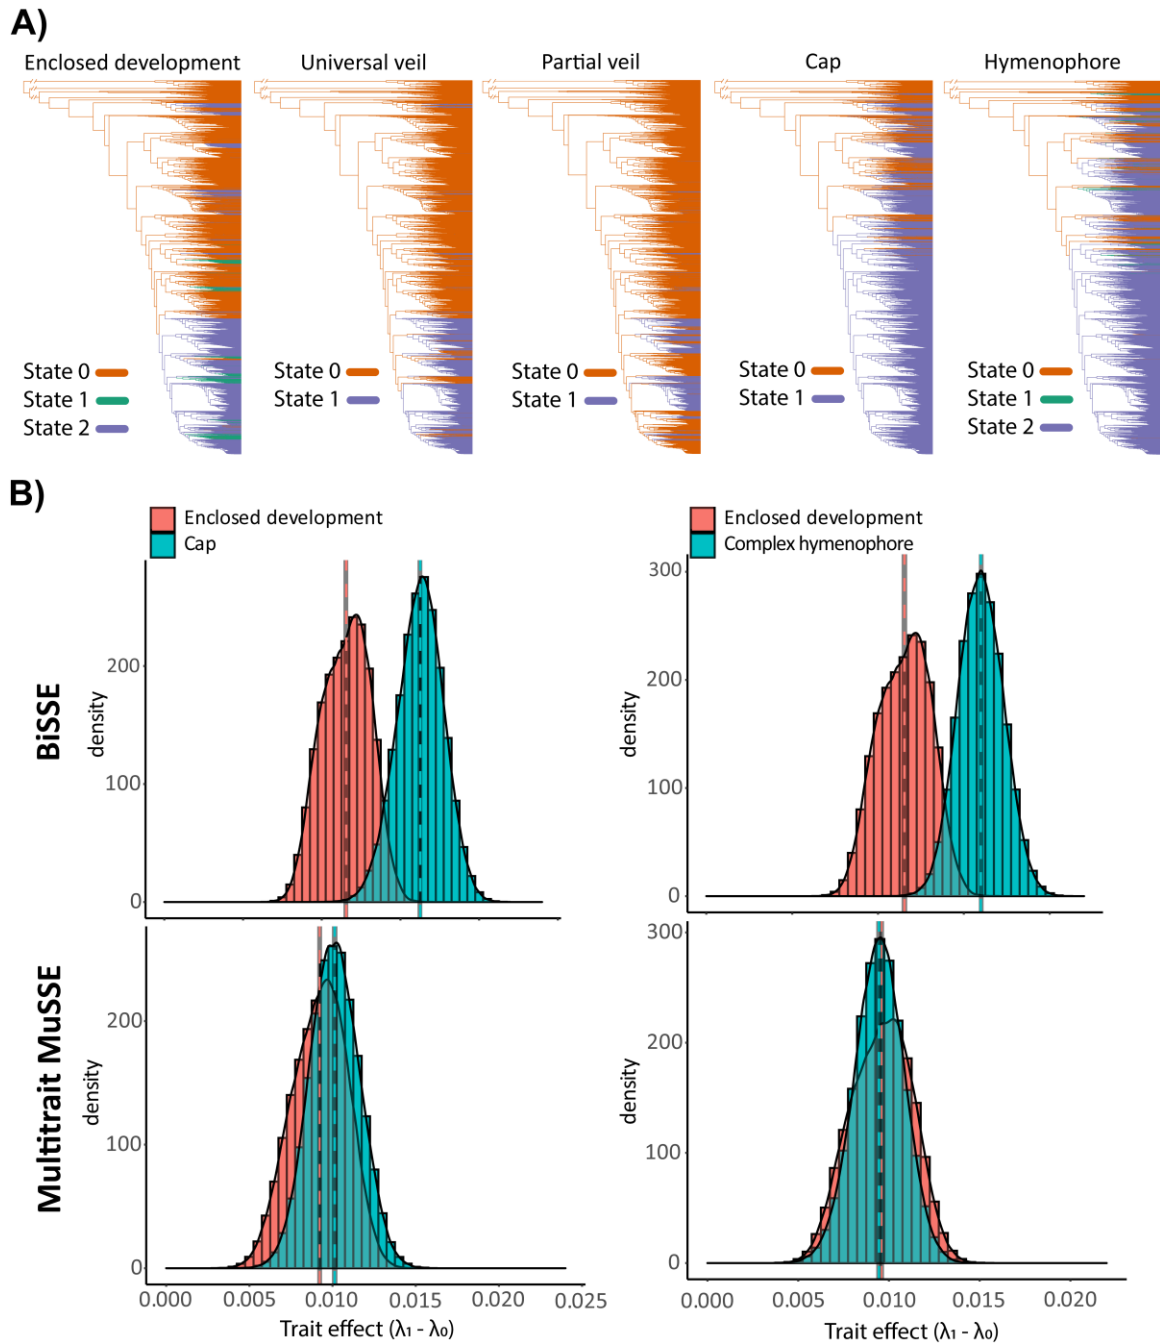

450

451 *Figure 4. A) Maximum parsimony ancestral reconstruction of five morphological*  
 452 *characters examined in this study. Enclosed development trait (open development - state 0,*  
 453 *semi-enclosed development – state 1, enclosed development – state 2). Universal veil trait*  
 454 *(absence – state 0, presence – state 1). Partial veil trait (absence – state 0, presence – state*  
 455 *1). Cap trait (absence – state 0, presence – state 1). Hymenophore complexity trait (Smooth*  
 456 *hymenophore - state 0, weakly-structured hymenophore – state 1, complex hymenophore –*  
 457 *state 2). B) speciation rate effects ( $\lambda_1 - \lambda_0$ ) inferred by BiSSE (upper row) and multitrait*  
 458 *MuSSE (bottom row) analyses. Histograms on the left show the comparison of the enclosed*  
 459 *development and the cap traits. Histograms on the right show the comparison of the*  
 460 *enclosed development and the hymenophore traits.*  
 461

## 462 Hymenophore complexity alone also impacts diversification

463 We were also curious whether hymenophore complexity alone influenced species  
464 diversification (the impact of the cap has been examined before, see Varga et al 2019). MP  
465 ancestral state reconstruction suggested that the most common ancestor of Agaricomycetes  
466 was a mushroom with smooth hymenophore and that weakly-structured and complex  
467 hymenophores evolved 41 - 46 and 74 - 91 times, respectively (table S4). BayesTraits and  
468 MuSSE analyses showed that the transition rate from weakly-structured towards complex  
469 hymenophore ( $q_{12}$ ) was 54.3 - 61.5 times higher than in the reverse direction ( $q_{21}$ ) and  
470 significantly 'non-equal' (figure 5, LRT,  $p < 0.05$ , log Bayes factor  $> 10$ ). We also found that  
471 the transition rate from weakly-structured hymenophore towards smooth hymenophore was  
472 13.4 - 17.3 times higher than in the reverse direction (LRT,  $p < 0.05$ , log Bayes factor  $> 10$ ),  
473 suggesting several reversals of weakly-structured hymenophores to smooth ones. This  
474 implies that complex hymenophores with increased surface area are favored during the  
475 evolution of mushroom-forming fungi.

476 We found that the diversification rate of species with complex hymenophore was  
477 significantly higher than that of species with smooth or weakly-structured hymenophore  
478 (LRT,  $p < 0.05$ ), while diversification rates of species with the latter two did not differ  
479 significantly (figure 5, LRT,  $p > 0.05$ ). These results suggest that only well-developed gills,  
480 pores, and teeth can positively affect diversification of mushroom-forming fungi, whereas  
481 weakly-structured hymenophores (bumps, ridges, veins) do not and they revert frequently to  
482 smooth surfaces.  
483

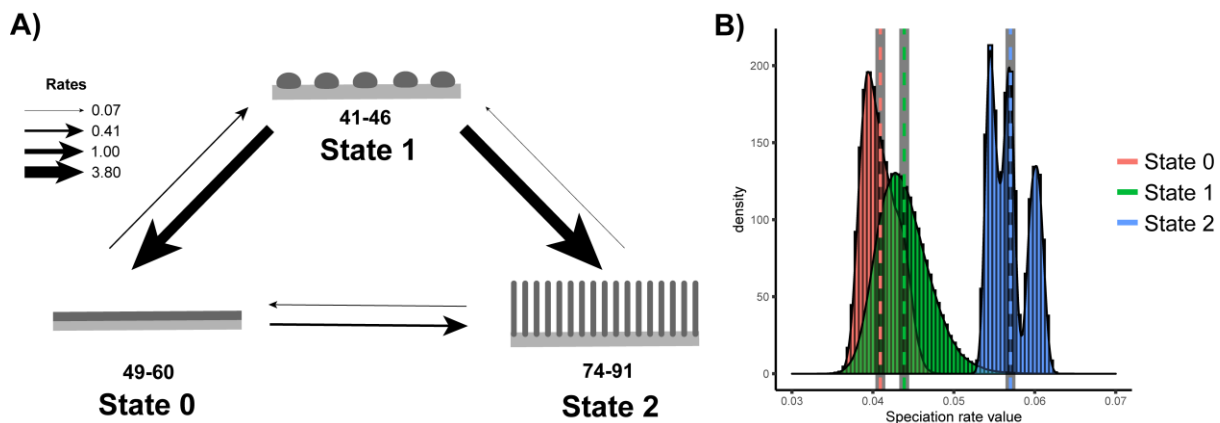

484

485 *Figure 5. Macro-evolutionary patterns of hymenophore complexity. A) Transition rates*  
486 *between the three character states (state 0 – smooth hymenophore, state 1 – weakly-*  
487 *structured hymenophore, state 2 – complex hymenophore), inferred by BayesTraits. The*  
488 *intervals below the schematic graphics represent the number of times a state evolved*  
489 *according to maximum parsimony ancestral state reconstruction. The width of the arrows is*  
490 *proportional to the transition rates. B) Histograms depicting the state dependent*  
491 *diversification rates of the three character states inferred by MuSSE.*  
492

492

## 493 Conclusions

494 The evolutionary success of species is strongly connected to their reproductive  
495 efficiency. Accordingly, the impact of innovations on reproductive ability influence which  
496 morphologies, behaviors or other traits reach high equilibrium frequencies or go extinct in  
497 their clades. In the context of fungi, traits related to spore production, dispersal and

498 germination are among the primary determinants of reproductive success in terrestrial  
499 habitats (Aguilar-Trigueros et al., 2019; Halbwegs et al., 2015; Hibbett & Binder, 2002;  
500 James, 2015; Norros et al., 2014; Peay et al., 2012). Such traits should, thus, drive  
501 morphological evolution in sexual fruiting bodies and should impact lineage diversification.  
502 Despite this clear prediction, what adaptations fruiting bodies evolved for increasing spore  
503 dispersal efficiency are hardly known and studies addressing the correlations between  
504 morphogenetic traits and species diversification are at paucity.

505 In this study, we provide evidence that morphological innovations pertaining to the  
506 efficiency of spore production show considerable asymmetry in their evolution and their  
507 evolution is associated with increased diversification rates (i.e., may be key innovations) in  
508 mushroom-forming fungi. These include enclosed development, in which fruiting body initials  
509 are ensheathed by veil tissues, providing protection to the fruiting body initial, in a manner  
510 analogous to the internally nursed embryos of viviparous animals and plants (though its  
511 important to note that the fruiting body initial serves a different purpose from the plant/animal  
512 embryo). In analogy, viviparity spurred lineage diversification in squamates and  
513 cyprinodontiform fishes (Helmstetter et al., 2016; Pyron & Burbrink, 2014). Our analyses  
514 provided clear support for convergent origins of and asymmetrical evolution favoring  
515 enclosed development and a correlation with increased lineage diversification rates. These  
516 results were robust to model and method choice, alternative coding regimes and not affected  
517 by character states at basal nodes or in any major clades.

518 Protecting fruiting body initials is of prime importance as these contain the developing  
519 hymenium, on which basidia and spores are born. Albeit fruiting bodies generally quickly  
520 complete their developmental program and sporulate (though in some species the process  
521 can take weeks), several factors can compromise development (desiccation, predators,  
522 infections, rain, other physical damages) and consequently impede sporulation. It has been  
523 shown that secondary metabolites, peptides, proteins (e.g., galectins) against bacteria or  
524 fungivorous animals (mammals, arthropods, nematodes) are produced by tissues that  
525 ensheath fruiting body initials (Bleuler-Martínez et al., 2011; Boulianne et al., 2000; Jaeger &  
526 Spiteller, 2010; Künzler, 2018; Sabotič et al., 2011, 2016). Enclosed development might also  
527 help phasing the growth of fruiting bodies by providing a sheltered environment for cell  
528 differentiation, after which rapid growth by cell expansion (Kües, 2000) lifts the hymenophore  
529 quickly above ground. This might be advantageous in terrestrial habitats, where developing  
530 at ground level and lifting the cap above ground reduced evaporation and potentially allows  
531 the development of larger fruiting bodies, which increase spore quantity and release height,  
532 two critical factors in dispersal (Norros et al., 2014).

533 At large evolutionary scales such as the one examined in this paper, causes of  
534 diversification rate differences may easily be distributed among a nested set of phenotypic  
535 innovations or phylogenetically co-distributed traits (Donoghue, 2005). To address this  
536 possibility, we examined two velar structures, which alone or in combination provide the  
537 physical barriers to the environment in most species with enclosed development, as well as  
538 alternative, phylogenetically nested or unknown traits. We found that both universal and  
539 partial veil and their combination associate with differences in diversification rates,  
540 suggesting that enclosure of the hymenophore by either veil type is sufficient for  
541 diversification rates to increase. We further examined the effects of two independent, but  
542 conceivably adaptive traits, the presence of a cap and structured hymenophore surfaces.  
543 Multitrait BISSE models, which test the combined effects of multiple traits on diversification  
544 in a single analysis, provided evidence that, albeit both traits influence diversification rates  
545 (see also Varga et al., 2019), their effects are independent from that of enclosed

546 development. Complex hymenophore itself was, independently of enclosed development,  
547 associated with higher diversification rates relative to simpler morphologies (smooth or  
548 weakly-structured hymenophores), suggesting that hymenophoral complexity is adaptive in  
549 mushroom-forming fungi, possibly by allowing the production of more propagules per unit  
550 biomass (Iapichino et al., 2021), variations in gill positioning (Fischer & Money, 2010),  
551 protection against predators (Nakamori & Suzuki, 2007), keeping high humidity (Halbwachs  
552 & Bässler, 2015) or producing local winds that help spores dispersal. Finally, hidden state  
553 speciation extinction analyses (Beaulieu & O'Meara, 2016) excluded the possibility that  
554 phylogenetically co-distributed and unobserved traits, rather than enclosed development is  
555 the main driver of diversification rate differences in mushroom-forming fungi.

556 Overall, these results give us confidence that the observed effect of enclosed  
557 development on diversification rates is robust to methods, dataset or other candidate traits  
558 which we tested. However, these analyses identified several traits which independently are  
559 associated with increases in diversification rates, indicating that beyond developmental  
560 types, the extant diversity of Agaricomycetes has probably been influenced by a complex  
561 interplay between multiple fruiting body and, possibly also nutritional innovations and that  
562 phylogenetically nested sets of these may underlie the radiation and evolutionary success of  
563 mushroom-forming fungi, one of the most diverse, important and spectacular components of  
564 the ecosystem.

565

## 566 **Acknowledgements**

567 The authors acknowledge support by the "Momentum" program of the Hungarian Academy  
568 of Sciences (contract No. LP2019-13/2019 to L.G.N.) and the European Research Council  
569 (grant no. 758161 to L.G.N.). We are thankful to Valéria Borsi, Alexey Sergeev and Judit  
570 Tóth Kőszeginé for providing us the images of *Cantharellus cibarius*, *Ramicola* sp., as well  
571 as *Phallus impudicus* and *Hydnum repandum*, respectively.

572

## 573 **References**

- 574 Aguilar-Trigueros, C. A., Hempel, S., Powell, J. R., Cornwell, W. K., & Rillig, M. C. (2019).  
575 Bridging reproductive and microbial ecology: a case study in arbuscular mycorrhizal  
576 fungi. *ISME Journal*, 13(4), 873–884. <https://doi.org/10.1038/s41396-018-0314-7>
- 577 Beaulieu, J. M., & O'Meara, B. C. (2016). Detecting hidden diversification shifts in models of  
578 trait-dependent speciation and extinction. *Systematic Biology*, 65(4), 583–601.  
579 <https://doi.org/10.1093/sysbio/syw022>
- 580 Blackburn, D. G. (1999). Viviparity and oviparity: Evolution and reproductive strategies.  
581 *Encyclopedia of Reproduction*, 4(JANUARY 1999), 994–1003.
- 582 Blackburn, D. G. (2015). Evolution of vertebrate viviparity and specializations for fetal  
583 nutrition: A quantitative and qualitative analysis. *Journal of Morphology*, 276(8), 961–  
584 990. <https://doi.org/10.1002/jmor.20272>
- 585 Bleuler-Martínez, S., Butschi, A., Garbani, M., Wilti, M. A., Wohlschlager, T., Potthoff, E.,  
586 Sabotia, J., Pohleven, J., Lüthy, P., Hengartner, M. O., Aebi, M., Künzler, M., Wilti, M.  
587 A., Wohlschlager, T., Potthoff, E., Sabotia, J., Pohleven, J., Lüthy, P., Hengartner, M.  
588 O., ... Künzler, M. (2011). A lectin-mediated resistance of higher fungi against predators  
589 and parasites. *Molecular Ecology*, 20(14), 3056–3070. <https://doi.org/10.1111/j.1365-294X.2011.05093.x>
- 591 Boulianne, R. P., Liu, Y., Lu, B. C., Kües, U., & Aebi, M. (2000). Fruiting body development  
592 in *Coprinus cinereus*: regulated expression of two galectins secreted by a non-classical  
593 pathway. *Microbiology*, 146(8), 1841–1853. <https://doi.org/10.1099/00221287-146-8-1841>
- 594



- 595 Braga, G. U. L., Rangel, D. E. N., Fernandes, É. K. K., Flint, S. D., & Roberts, D. W. (2015).  
596 Molecular and physiological effects of environmental UV radiation on fungal conidia.  
597 *Current Genetics*, 61(3), 405–425. <https://doi.org/10.1007/s00294-015-0483-0>  
598 Cléménçon, H. (2012). *Cytology and Plectology of the Hymenomycetes* (2nd ed.). Gebr.  
599 Borntraeger Verlagsbuchhandlung.
- 600 Donoghue, M. J. (2005). Key innovations, convergence, and success: macroevolutionary  
601 lessons from plant phylogeny. *Paleobiology*, 31(2), 77–93. [https://doi.org/10.1666/0094-](https://doi.org/10.1666/0094-8373(2005)031[0077:kicasm]2.0.co;2)  
602 8373(2005)031[0077:kicasm]2.0.co;2
- 603 Dressaire, E., Yamada, L., Song, B., & Roper, M. (2016). Mushrooms use convectively  
604 created airflows to disperse their spores. *Proceedings of the National Academy of*  
605 *Sciences of the United States of America*, 113(11), 2833–2838.  
606 <https://doi.org/10.1073/pnas.1509612113>
- 607 Fischer, M. W. F., & Money, N. P. (2010). Why mushrooms form gills: efficiency of the  
608 lamellate morphology. *Fungal Biology*, 114(1), 57–63.  
609 <https://doi.org/10.1016/j.mycres.2009.10.006>
- 610 Fitzjohn, R. G. (2012). Diversitree: Comparative phylogenetic analyses of diversification in R.  
611 *Methods in Ecology and Evolution*, 3(6), 1084–1092. [https://doi.org/10.1111/j.2041-](https://doi.org/10.1111/j.2041-210X.2012.00234.x)  
612 210X.2012.00234.x
- 613 Geweke, J. (1992). Evaluating the accuracy of sampling-based approaches to the  
614 calculation of posterior moments. *Bayesian Statistics 4*, 169–193.  
615 <https://doi.org/1176289>
- 616 Goldberg, R. B., de Paiva, G., & Yadegari, R. (1994). Plant Embryogenesis: Zygote to Seed.  
617 *Science*, 266(5185), 605–614. <https://doi.org/10.1126/science.266.5185.605>
- 618 Halbwachs, H., & Bässler, C. (2015). Gone with the wind – a review on basidiospores of  
619 lamellate agarics. *Mycosphere*, 6(1), 78–112.  
620 <https://doi.org/10.5943/mycosphere/6/1/10>
- 621 Halbwachs, H., Brandl, R., & Bässler, C. (2015). Spore wall traits of ectomycorrhizal and  
622 saprotrophic agarics may mirror their distinct lifestyles. *Fungal Ecology*, 17, 197–204.  
623 <https://doi.org/10.1016/j.funeco.2014.10.003>
- 624 Helmstetter, A. J., Papadopulos, A. S. T., Igea, J., Van Dooren, T. J. M., Leroi, A. M., &  
625 Savolainen, V. (2016). Viviparity stimulates diversification in an order of fish. *Nature*  
626 *Communications*, 7, 11271. <https://doi.org/10.1038/ncomms11271>
- 627 Hibbett, D. S. (2004). Trends in Morphological Evolution in Homobasidiomycetes Inferred  
628 Using Maximum Likelihood: A Comparison of Binary and Multistate Approaches.  
629 *Systematic Biology*, 53(6), 889–903. <https://doi.org/10.1080/10635150490522610>
- 630 Hibbett, D. S., & Binder, M. (2002). Evolution of complex fruiting-body morphologies in  
631 homobasidiomycetes. *Proceedings of the Royal Society B: Biological Sciences*,  
632 49(191), 1963–1969. <https://doi.org/10.1098/rspb.2002.2123>
- 633 Höhna, S., Landis, M. J., Heath, T. A., Boussau, B., Lartillot, N., Moore, B. R., Huelsenbeck,  
634 J. P., & Ronquist, F. (2016). RevBayes: Bayesian Phylogenetic Inference Using  
635 Graphical Models and an Interactive Model-Specification Language. *Systematic*  
636 *Biology*, 65(4), 726–736. <https://doi.org/10.1093/sysbio/syw021>
- 637 Höhna, S., Ronquist, F., Landis, M. J., Boussau, B., Heath, T. A., Lartillot, N., Pett, W.,  
638 Freyman, W. A., & Huelsenbeck, J. P. (2019). *RevBayes: Bayesian phylogenetic*  
639 *inference using probabilistic graphical models and an interpreted language*.  
640 <https://Revbayes.Github.io/>.
- 641 Iapichino, M., Wang, Y.-W., Gentry, S., Pringle, A., & Seminara, A. (2021). A precise  
642 relationship among Buller's drop, ballistospore, and gill morphologies enables maximum  
643 packing of spores within gilled mushrooms. *Mycologia*, 00(00), 1–12.  
644 <https://doi.org/10.1080/00275514.2020.1823175>
- 645 Jaeger, R. J. R., & Spiteller, P. (2010). Mycenaaurin A, an antibacterial polyene pigment  
646 from the fruiting bodies of mycena aurantiomarginata. *Journal of Natural Products*,  
647 73(8), 1350–1354. <https://doi.org/10.1021/np100155z>
- 648 James, T. Y. (2015). Why mushrooms have evolved to be so promiscuous: Insights from  
649 evolutionary and ecological patterns. *Fungal Biology Reviews*, 29(3–4), 167–178.

- 650 <https://doi.org/10.1016/j.fbr.2015.10.002>
- 651 Kües, U. (2000). Life history and developmental processes in the basidiomycete *Coprinus*  
652 *cinereus*. *Microbiology and Molecular Biology Reviews* : *MMBR*, *64*(2), 316–353.  
653 <https://doi.org/10.1128/MMBR.64.2.316-353.2000>
- 654 Künzler, M. (2018). How fungi defend themselves against microbial competitors and animal  
655 predators. *PLOS Pathogens*, *14*(9), e1007184.  
656 <https://doi.org/10.1371/journal.ppat.1007184>
- 657 Liu, Y. J., & Hall, B. D. (2004). Body plan evolution of ascomycetes, as inferred from an RNA  
658 polymerase II phylogeny. *Proceedings of the National Academy of Sciences of the*  
659 *United States of America*, *101*(13), 4507–4512.  
660 <https://doi.org/10.1073/pnas.0400938101>
- 661 Louca, S., & Doebeli, M. (2018). Efficient comparative phylogenetics on large trees.  
662 *Bioinformatics*, *34*(6), 1053–1055. <https://doi.org/10.1093/bioinformatics/btx701>
- 663 Maddison, W. P., Midford, P. E., & Otto, S. P. (2007). Estimating a binary character's effect  
664 on speciation and extinction. *Systematic Biology*, *56*(5), 701–710.  
665 <https://doi.org/10.1080/10635150701607033>
- 666 Matheny, P. B., Curtis, J. M., Hofstetter, V., Aime, M. C., Moncalvo, J.-M. J.-M. M., Ge, Z.-W.  
667 Z.-W. W., Yang, Z. L. Z.-L., Slot, J. C., Ammirati, J. F., Baroni, T. J., Bougher, N. L.,  
668 Hughes, K. W., Lodge, D. J., Kerrigan, R. W., Seidl, M. T., Aanen, D. K., DeNitis, M.,  
669 Daniele, G. M., Desjardin, D. E., ... Hibbett, D. S. (2006). Major clades of Agaricales: A  
670 multilocus phylogenetic overview. *Mycologia*, *98*(6), 982–995.  
671 <https://doi.org/10.3852/mycologia.98.6.982>
- 672 Meade, A., & Pagel, M. (2016). *BayesTraits V3. November*, 81.  
673 <http://www.evolution.rdg.ac.uk/BayesTraitsV3/Files/BayesTraitsV3.Manual.pdf>
- 674 Nakamori, T., & Suzuki, A. (2007). Defensive role of cystidia against Collembola in the  
675 basidiomycetes *Russula bella* and *Strobilurus ohshimae*. *Mycological Research*,  
676 *111*(11), 1345–1351. <https://doi.org/10.1016/j.mycres.2007.08.013>
- 677 Norros, V., Rannik, Ü., Hussein, T., Petäjä, T., Vesala, T., & Ovaskainen, O. (2014). Do  
678 small spores disperse further than large spores? *Ecology*, *95*(6), 1612–1621.  
679 <https://doi.org/10.1890/13-0877.1>
- 680 Pagel, M. (1999). Inferring the historical patterns of biological evolution. *Nature*, *401*(6756),  
681 877–884. <https://doi.org/10.1038/44766>
- 682 Peay, K. G., Schubert, M. G., Nguyen, N. H., & Bruns, T. D. (2012). Measuring  
683 ectomycorrhizal fungal dispersal: macroecological patterns driven by microscopic  
684 propagules. *Molecular Ecology*, *21*(16), 4122–4136. <https://doi.org/10.1111/j.1365-294X.2012.05666.x>
- 686 Plummer, M., Best, N., Cowles, K., & Vines, K. (2006). CODA: convergence diagnosis and  
687 output analysis for MCMC. *R News*, *6*(March), 7–11. <https://doi.org/10.1159/000323281>
- 688 Pyron, R. A., & Burbrink, F. T. (2014). Early origin of viviparity and multiple reversions to  
689 oviparity in squamate reptiles. *Ecology Letters*, *17*(1), 13–21.  
690 <https://doi.org/10.1111/ele.12168>
- 691 Rabosky, D. L., & Goldberg, E. E. (2015). Model inadequacy and mistaken inferences of  
692 trait-dependent speciation. *Systematic Biology*, *64*(2), 340–355.  
693 <https://doi.org/10.1093/sysbio/syu131>
- 694 Reijnders, A. F. M. (1983). Supplementary notes on basidiocarp ontogeny in agarics.  
695 *Persoonia*, *12*(1), 1–20.
- 696 Roberts, R. M., Green, J. A., & Schulz, L. C. (2016). The evolution of the placenta.  
697 *Reproduction*, *152*(5), R179–R189. <https://doi.org/10.1530/REP-16-0325>
- 698 Sabotič, J., Kilaru, S., Budič, M., Gašparič, M. B., Gruden, K., Bailey, A. M., Foster, G. D., &  
699 Kos, J. (2011). Protease inhibitors clitocypin and macrocypin are differentially  
700 expressed within basidiomycete fruiting bodies. *Biochimie*, *93*(10), 1685–1693.  
701 <https://doi.org/10.1016/j.biochi.2011.05.034>
- 702 Sabotič, J., Ohm, R. A., & Künzler, M. (2016). Entomotoxic and nematotoxic lectins and  
703 protease inhibitors from fungal fruiting bodies. *Applied Microbiology and Biotechnology*,  
704 *100*(1), 91–111. <https://doi.org/10.1007/s00253-015-7075-2>

- 705 Sánchez-García, M., Ryberg, M., Khan, F. K., Varga, T., Nagy, L. G., & Hibbett, D. S.  
706 (2020). Fruiting body form, not nutritional mode, is the major driver of diversification in  
707 mushroom-forming fungi. *Proceedings of the National Academy of Sciences*, 117(51),  
708 32528–32534. <https://doi.org/10.1073/pnas.1922539117>
- 709 Schmitt, I., Prado, R. del, Grube, M., & Lumbsch, H. T. (2009). Repeated evolution of closed  
710 fruiting bodies is linked to ascoma development in the largest group of lichenized fungi  
711 (Lecanoromycetes, Ascomycota). *Molecular Phylogenetics and Evolution*, 52(1), 34–44.  
712 <https://doi.org/10.1016/j.ympev.2009.03.017>
- 713 Vamosi, J. C., Magallón, S., Mayrose, I., Otto, S. P., & Sauquet, H. (2018).  
714 Macroevolutionary Patterns of Flowering Plant Speciation and Extinction. *Annual*  
715 *Review of Plant Biology*, 69(February), 685–706. [https://doi.org/10.1146/annurev-](https://doi.org/10.1146/annurev-arplant-042817-040348)  
716 [arplant-042817-040348](https://doi.org/10.1146/annurev-arplant-042817-040348)
- 717 Varga, T., Krizsán, K., Földi, C., Dima, B., Sánchez-García, M., Sánchez-Ramírez, S.,  
718 Szöllősi, G. J. G. J., Szarkándi, J. G. J. G., Papp, V., Albert, L., Andreopoulos, W.,  
719 Angelini, C., Antonín, V., Barry, K. W. K. W., Bougher, N. L. N. L., Buchanan, P., Buyck,  
720 B., Bense, V., Catcheside, P., ... Nagy, L. G. L. G. (2019). Megaphylogeny resolves  
721 global patterns of mushroom evolution. *Nature Ecology & Evolution*, 3(4), 668–678.  
722 <https://doi.org/10.1038/s41559-019-0834-1>
- 723 Westoby, M., & Rice, B. (1982). EVOLUTION OF THE SEED PLANTS AND INCLUSIVE  
724 FITNESS OF PLANT TISSUES. *Evolution*, 36(4), 713–724.  
725 <https://doi.org/10.1111/j.1558-5646.1982.tb05437.x>
- 726 Xie, W., Lewis, P. O., Fan, Y., Kuo, L., & Chen, M. H. (2011). Improving marginal likelihood  
727 estimation for bayesian phylogenetic model selection. *Systematic Biology*, 60(2), 150–  
728 160. <https://doi.org/10.1093/sysbio/syq085>

729

## 730 Descriptions of supplementary materials

731 Supplementary Text S1: Detailed description of the analyses of alternative coding regimes of  
732 enclosed development

733

734 Supplementary Table S1. Character coding data table and a summary of species and  
735 genera on which histological studies have been analyzed.

736

737 Supplementary Table S2. Parameters and model tests of the BayesTraits analyses.

738

739 Supplementary Table S3. State-specific sampling fractions and inferred parameters of the  
740 state-specific speciation and extinction (SSE) analyses.

741

742 Supplementary Table S4. Cost matrices used in maximum parsimony ancestral state  
743 reconstruction analyses and the number of transformations between states of enclosed  
744 development and hymenophore.

745

746 Supplementary Table S5. Model tests performed on state-specific speciation and extinction  
747 (SSE) analyses.

748

749 Supplementary Figure S1. A plot of maximum parsimony ancestral states of enclosed  
750 development on a randomly chosen tree (#8) from Varga et al. 2019. Green – open  
751 development, red – semi-enclosed development, blue – enclosed development.

752

753 Supplementary Figure S2. Visual representation of the BayesTraits analyses of enclosed  
754 development, where the stem node of 13 clades was constrained to state 0. A) The

755 phylogenetic tree of Agaricomycetes with 13 clades of which stem node was constrained. B)  
756 Histograms of transition rates of the default analyses (red) and the analyses where the stem  
757 nodes were constrained to 0 (green).

758

759 Supplementary Figure S3. Density plots of transition rates between states of enclosed  
760 development inferred under alternative and default (3ST) character coding regimes.  
761 Alternative coding regimes were created by setting state 1 or 01 of all species in a clade at a  
762 time to 0 and state 12 to 2. Results are shown for six clades tested this way. Below each  
763 plot, a table showing mean and standard deviation of parameter estimates is given.

764

765 Supplementary Figure S4. Histograms depicting state-specific transition rates of the  
766 universal veil (A) and partial veil traits (B). The state-specific transition rates were inferred by  
767 Bayesian MuSSE analyses using ten chronograms of Agaricomycetes from Varga et al.  
768 2019.  $\lambda_1$  is the speciation rate of lineages with a universal (A) or partial veil (B) and  
769  $\lambda_0$  is the speciation rate of lineages without a universal (A) or partial veil (B).

770

771 Supplementary Figure S5. Comparative boxplots of open and enclosed development-  
772 specific speciation rates inferred by hidden state speciation and extinction (HiSSE) analysis.  
773 We compared the inferred speciation rate of lineages with enclosed (green) and open (red)  
774 development within each analysis of the ten randomly chosen chronograms.

775
